# 1 Melt electrowritten scaffolds with bone-inspired fibrous and mineral 2 architectures to enhance BMP2 delivery and human MSC osteogenesis

3 Kian F. Eichholz.<sup>1,2,3</sup>, David A. Hoey.<sup>1,2,3,4</sup>

4 <sup>1</sup>Dept. Mechanical, Aeronautical and Biomedical Engineering, Materials and Surface Science Institute, University of  
5 Limerick, Limerick, Ireland

6 <sup>2</sup>Trinity Centre for Bioengineering, Trinity Biomedical Sciences Institute, Trinity College Dublin, Ireland

7 <sup>3</sup>Dept. of Mechanical and Manufacturing Engineering, School of Engineering, Trinity College Dublin, Ireland

8 <sup>4</sup>Advanced Materials and Bioengineering Research Centre, Trinity College Dublin & RCSI

9

## 10 1 Abstract

11 Material micro-architecture and chemistry play pivotal roles in driving cell behaviour. Bone at a  
12 cellular level consists of arranged fibres with a cross-fibrillar mineral phase made up of curved nano-  
13 sized needle shaped crystals. This nano-structured mineral architecture can bind and stabilise  
14 proteins within bone for centuries and thus holds promise as a strategy for therapeutic delivery in  
15 regenerative medicine. Herein, we use melt electrowriting (MEW) technology to create fibrous 3D  
16 PCL micro-architectures. These scaffolds were further modified with an extrafibrillar coating of plate  
17 shaped micron-sized calcium phosphate crystals (pHA), or with a novel extrafibrillar coating of  
18 needle shaped nano-sized crystals (nnHA). A third scaffold was developed whereby nano-sized  
19 crystals were placed intrafibrillarly during the MEW process (iHA). X-ray diffraction revealed altered  
20 crystal structure and crystallinity between groups, with hydroxyapatite (HA) being the primary phase  
21 in all modifications. Water contact angle was investigated revealing increased hydrophilicity with  
22 extrafibrillar coatings, while tensile testing revealed enhanced stiffness in scaffolds fabricated with  
23 intrafibrillar HA. Biological characterisation demonstrated significantly enhanced human  
24 stem/stromal cell mineralisation with extrafibrillar coatings, with a 5-fold increase in mineral  
25 deposition with plate like structures and a 14-fold increase with a needle topography, demonstrating  
26 the importance of bone mimetic architectures. Given the protein stabilising properties of mineral,  
27 these materials were further functionalised with BMP2. Extrafibrillar coatings of nano-needles  
28 facilitated a controlled release of BMP2 from the scaffold which further enhanced mineral  
29 deposition by osteoprogenitors. This study thus outlines a method for fabricating scaffolds with  
30 precise fibrous micro-architectures and bone mimetic nano-needle HA extrafibrillar coatings which  
31 significantly enhance mesenchymal stem/stromal cell (MSC) osteogenesis and therapeutic delivery  
32 and thus hold great promise for bone tissue regeneration.

## 33 **2 Introduction**

34 Autografts are the gold standard for bone defect repair due to their osteoconductive, osteoinductive  
35 and immunocompatible properties, but unfortunately are limited in supply [1]. Due to technology  
36 advancements and an improved understanding of the physiological mechanisms of bone repair,  
37 synthetic tissue engineering approaches have demonstrated great progress in developing  
38 bioinspired materials that can promote bone formation [2]. These approaches continue to fall short  
39 of the gold standard however, therefore, continued development is required. Bone is a complex,  
40 hierarchical multi-phasic organ comprised primarily of mineralised collagen fibrils spanned by  
41 additional continuous, cross-fibrillar mineral units [3, 4]. It was only recently identified that the first  
42 fundamental component in this hierarchy is composed of needle-shaped mineral units of base 5 nm  
43 and length 50 – 100 nm, which merge to form platelets and mineral stacks and aggregate to form  
44 irregular 3D structures of size 200 – 300 nm which are crossfibrillar in nature [4]. It is the  
45 combination of collagen and mineral with specific topographies, working in unison in this  
46 hierarchical structure, which gives the bone both its excellent biological and mechanical properties.  
47 Moreover, this mineral nano-topography identified in bone is believed to be a key contributor to  
48 non-collagenous protein binding and stabilisation, preserving proteins for centuries within the tissue  
49 without denaturation [5]. This therefore provides a potential strategy for therapeutic delivery in  
50 regenerative medicine [6]. Recapitulating this unique multiscale architecture may represent an  
51 innovative approach to develop effective bioinspired materials to promote bone repair.

52 Bone formation occurs following mesenchymal stem/stromal cell osteogenic differentiation into an  
53 osteoblast, which begins laying down collagen fibrils and enriching the surrounding environment  
54 with alkaline phosphatase and osteocalcin to promote mineral deposition within the collagen  
55 template [7, 8]. The resulting nano-crystals are initially formed within collagen fibrils, eventually  
56 nucleating to fill the voids forming a composite structure of mineral and collagen fibres  
57 approximately 10  $\mu\text{m}$  in diameter [9]. The underlying collagen fibrillar template is thus crucial in  
58 dictating cellular behaviour in bone and many other tissues, with dysregulation of this unique  
59 structure leading to undesirable outcomes including cell death, abnormal differentiation and tumour  
60 development [10, 11]. Through the advent of new technology such as 3D printing, precise control of  
61 scaffold architecture is now achievable [12]. Fused deposition modelling (FDM) can produce  
62 scaffolds with defined fibre architecture creating pores of differing shapes [13] in addition to  
63 facilitating mineral incorporation [14-18], which in turn drives mesenchymal stem/stromal cell (MSC)  
64 differentiation down specific lineages. However, FDM is limited in that fibre diameters below 100  
65  $\mu\text{m}$  are difficult to fabricate. These relatively large fibres result in a pseudo-3D environment at the  
66 scale of the cell [19]. Electrospinning is a common fabrication technique to produce physiological

67 fibre diameters on the nano/micron scale which have been utilised in bone tissue engineering  
68 strategies [20, 21]. However, due to the unstable “whipping” motion of the electrospinning jet  
69 during fibre deposition, there is limited control over fibre architecture using this approach. Melt  
70 Electrospinning Writing (MEW) is a recently developed 3D printing technology which overcomes the  
71 above limitations of FDM and electrospinning, being capable of fabricating and controlling the  
72 deposition of micron-scale fibres [22-24]. This facilitates the manufacture of complex fibrous micro-  
73 architectures [25-27] consistent with that seen in native extracellular matrix (ECM) including that of  
74 bone. We recently utilised MEW to fabricate scaffolds with bone inspired fibre diameters of 10  $\mu\text{m}$   
75 and investigated whether the fibre architecture in terms of degrees of alignment could influence  
76 stem/stromal cell behaviour [28]. Interestingly, the combination of fibre diameter and alignment had  
77 significant impact on cell shape, cell signalling and ultimately MSC osteogenesis, with a 90° fibre  
78 architecture mediating a 4-fold increase in stem/stromal cell mineralization when compared to 10°  
79 aligned architectures or a traditional random electrospun scaffold, demonstrating the critical role of  
80 fibrillar architecture in mediating stem/stromal cell behaviour and highlighting MEW as a powerful  
81 tool to fabricate physiological bioinspired environments for tissue engineering strategies.

82 In bone tissue, the mineral component makes up 60-70% of its dry weight, and is composed  
83 primarily of non-stoichiometric apatite along with other loosely bound ions including  $\text{Ca}^{2+}$ ,  $\text{HPO}_4^{2-}$ ,  
84  $\text{CO}_3^{2-}$  and  $\text{Mg}^{2+}$  in a hydrated layer at the surface [29]. As with fibrillar architecture, the mineral  
85 structure in bone plays a key role in mediating cell behaviour, with deficiencies or changes in mineral  
86 composition contributing to diseases such as osteoporosis [30]. This has been exploited in a host of  
87 strategies for orthopaedic and dental applications, where materials and surfaces have been modified  
88 with calcium phosphates with the aim of creating biomimetic materials which promote  
89 osseointegration and tissue regeneration. This includes coatings for implant fixation, cements and  
90 adhesives for orthopaedic and dental implants, and synthetic bone grafts [31]. A wide range of  
91 commercially available materials have been investigated, including hydroxyapatite (HA), calcium  
92 deficient apatite (CDA),  $\alpha$ - and  $\beta$  tricalcium phosphate (TCP) and biphasic calcium phosphates such  
93 as HA + TCP, with a range of other materials including dicalcium phosphate (DCP) and Tetracalcium  
94 phosphate (TTCP) also being investigated [32]. As with fibrillar architecture, an ever increasing  
95 appreciation for the importance of the architecture and particle size of the mineral phase is being  
96 gained, which defines surface topography and thus has a considerable influence on cell behaviour  
97 and scaffold performance [33]. When cultured on nano-scale HA (nHA) films with varying particles  
98 sizes from 20 – 80 nm in diameter, MSCs exhibit a trend of greater viability and proliferation with  
99 smaller particle sizes [34]. The osteogenic capacity of nHA has been further demonstrated in a range  
100 of studies where cells have been cultured in nHA suspensions with particles of size between 20 – 100

101 nm, with cells demonstrating uptake of particles and exhibiting enhanced osteogenic differentiation  
102 [35-37]. The role of HA particle size has also been investigated in the 3D printing of composite PCL-  
103 HA blends, with enhanced proliferation and alkaline phosphatase (ALP) activity of MSCs seen with  
104 nano-particles compared to micro-particles [38]. Remarkably, particle size has not only been shown  
105 to be an important cue for MSC osteogenesis, but also plays a role in suppressing undesired cellular  
106 outcomes in bone. This has been demonstrated via osteosarcoma inhibition [34] and reduced  
107 melanoma proliferation [39] with nHA compared to larger particles, further reinforcing the  
108 therapeutic potential of nano-scale particles for additional applications such as bone regeneration  
109 following tumour ablation. A recent study has also demonstrated the regenerative capacity of grafts  
110 with a needle surface topography *in-vivo*, with sub-micron needles triggering earlier and accelerated  
111 bone formation [40].

112 Bone tissue also houses non-collagenous proteins and growth factors embedded within its  
113 composite matrix, which are remarkably resolute and can be preserved for centuries due to the  
114 great stability provided by the mineral structure [5]. It is thus of no surprise that the great binding  
115 affinity to HA of a host of biological and synthetic components has been exploited for therapeutic  
116 benefits. HA has been extensively used as a delivery mechanism for BMP2 protein with proven  
117 success in a number of *in-vivo* models [41-43], while nHA particles have also been used for non-viral  
118 gene delivery of BMP2 to enhance MSC osteogenesis [44, 45]. Anti-tumour drugs have also been  
119 combined with nHA as a delivery vector, with potential applications in osteosarcoma chemotherapy  
120 [46] and the development of targeted drug delivery methods [47]. Interestingly, protein binding and  
121 stabilization is closely related to the nanoscale structural features of the mineral coatings [6],  
122 demonstrating the importance of controlling this nHA architecture. In addition to the already pro-  
123 osteogenic capabilities of biomimetic nHA, there is great potential to exploit its natural affinity to  
124 further advance treatments by facilitating therapeutic delivery providing an extensive range of  
125 enhanced regenerative benefits.

126 In this study, we aim to recapitulate the native structure of bone via the development of a  
127 biomimetic tissue regeneration strategy comprised of a micro-fibrous matrix spanned by an  
128 intrafibrillar nano-needle mineral phase stabilising bound protein for enhanced tissue regeneration.  
129 Herein, we use melt electrowriting (MEW) technology to create fibrous 3D PCL micro-architectures.  
130 These scaffolds were further modified with an extrafibrillar coating of plate shaped micron-sized  
131 calcium phosphate crystals (pHA), or with a novel extrafibrillar coating of needle shaped nano-sized  
132 crystals (nnHA). A third scaffold was developed whereby nano-sized crystals were placed  
133 intrafibrillarly during the MEW process (iHA). Along with vastly differing surface topographies,

134 surface chemistry was also altered, with calcium/phosphate ratios within the range seen in healthy  
135 native bone. Biological characterisation demonstrated significantly enhanced human stem/stromal  
136 cell mineralisation with extrafibrillar coatings, with a needle topography producing the most robust  
137 bone formation, demonstrating the importance of bone mimetic architectures. Given the protein  
138 stabilising properties of mineral, these materials were further functionalised with BMP2.  
139 Extrafibrillar coatings of nano-needles facilitated a controlled release of BMP2 from the scaffold  
140 which further enhanced mineral deposition by osteoprogenitors. This study thus outlines a method  
141 for fabricating scaffolds with precise fibrous micro-architectures and bone mimetic nano-needle HA  
142 extrafibrillar coatings which significantly enhance MSC osteogenesis and therapeutic delivery and  
143 thus holds great promise for bone tissue regeneration.

## 144 **3 Materials and methods**

### 145 **3.1 Scaffold fabrication**

#### 146 *3.1.1 Polycaprolactone (PCL) melt electrowriting*

147 Fibrous scaffolds with a fibre diameter of 10  $\mu\text{m}$ , square apparent pore size of 50  $\mu\text{m}$ , and layer  
148 offset of 300  $\mu\text{m}$  were fabricated on a custom built MEW apparatus as previously described [28].  
149 We have demonstrated that this fibrous scaffold architecture is optimal for MSC osteogenesis [28].  
150 Briefly, heated air at a temperature of 90°C was circulated around a syringe to melt  
151 polycaprolactone (PCL) (Sigma Aldrich 440744, average Mn 80,000), with air pressure being used to  
152 extrude the polymer through a 21G needle with high voltage applied at a distance of 15 mm from a  
153 grounded aluminium collector plate. Fibres were deposited with a 90° offset between subsequent  
154 layers to result in a square pore shape. Scaffolds for control (C) groups were used without further  
155 mineral modification.

#### 156 *3.1.2 Plate hydroxyapatite (pHA) coating*

157 This coating was carried out via a saturated simulated body fluid (SBF) solution, as described by  
158 Martine *et al* [48]. Reactions were carried out in 50ml conical tubes, with reagent volumes being  
159 maintained at 40 ml at each step of the process and 6 scaffolds of dimension 3 x 3 cm being  
160 processed per tube. Scaffolds were immersed in 70% ethanol for 15 min under vacuum and treated  
161 with 2M NaOH for 45 min at 37°C following a 5 min vacuum treatment to remove air bubbles.  
162 Scaffolds were rinsed 5 times in MilliQ water and immersed in 10x SBF, previously brought to a pH of  
163 6 for 30 min at 37°C following a 5 min vacuum treatment. The coating step in 10x SBF was repeated  
164 a further two times minus the vacuum treatment. Scaffolds were then treated with 0.5M NaOH for

165 30 min at 37°C, rinsed 5 times in MilliQ water and allowed to dry overnight. Scaffolds treated with  
166 this coating method are defined as plate hydroxyapatite (pHA).

### 167 *3.1.3 Nano-needle hydroxyapatite (nnHA) coating*

168 We developed a nano-hydroxyapatite coating to coat scaffolds with nano-needle mineral units.  
169 Sample pre- and post-processing was carried out as per the calcium phosphate coating procedure,  
170 with the 10x SBF treatment step being substituted for alternative calcium and phosphate solutions  
171 [49, 50]. The calcium solution was made with 0.05M calcium chloride dihydrate (Sigma Aldrich  
172 C7902) in MilliQ water. The phosphate solution was made with 0.03M sodium phosphate tribasic  
173 dodecahydrate (Sigma Aldrich S7778) and 0.01M sodium hydroxide in MilliQ water. The entire  
174 coating procedure is outlined as below. Scaffolds were immersed in 70% ethanol for 15 min under  
175 vacuum and treated with 2M NaOH for 45 min at 37°C following a 5 min vacuum treatment to  
176 remove air bubbles. Scaffolds were rinsed 5 times in MilliQ water and added to 20 ml of the calcium  
177 solution. 20 ml of the phosphate solution was slowly added to the calcium solution, and scaffolds  
178 were incubated for 30 min at 37°C following a 5 min vacuum treatment. This coating procedure was  
179 repeated a further two times minus the vacuum treatment. Scaffolds were then treated with 0.5M  
180 NaOH for 30 min at 37°C, rinsed 5 times in MilliQ water and allowed to dry overnight. Scaffolds  
181 treated with this coating method are defined as nano-needle hydroxyapatite (nnHA).

### 182 *3.1.4 Hydroxyapatite incorporated (iHA) PCL melt electrowriting*

183 A nHA-PCL blend was created by incorporating a 3.5wt% of nano-hydroxyapatite (Sigma Aldrich  
184 677418) into the polymer. PCL and nano-hydroxyapatite with a total mass of 1 g was added to a  
185 glass vial, with 10 ml of chloroform being added under stirring until dissolved. Particles were  
186 dispersed in the solution by sonication for 1 h, after which it was poured into a glass dish and left  
187 overnight for chloroform to evaporate. The resulting film was formed into pellets which were loaded  
188 into 1 ml BD-Braun syringes. The syringes were heated for 1 h at 110°C, and centrifuged at 4,000g  
189 for 60 s to remove air. The previous heating and centrifugation steps were repeated for a total of 8  
190 cycles, or until a homogenous blend was present in the syringe with no air bubbles. MEW processing  
191 parameters were optimised to facilitate controlled deposition of PCL-nHA blends, with temperature  
192 increased to 110°C and voltage increased by approximately 0.5 kV. Scaffolds for this modification  
193 method are defined as fibre incorporated hydroxyapatite (iHA).

## 194 **3.2 Scaffold characterisation**

### 195 *3.2.1 SEM imaging and Energy-dispersive X-ray spectroscopy*

196 For SEM imaging, samples were prepared for imaging by coating with gold/palladium for 40 s at a  
197 current of 40 mA. For analysis with energy-dispersive X-ray spectroscopy (EDX), scaffolds were  
198 carbon coated and analysed at a voltage of 15kV in a Zeiss ULTRA plus SEM with an 80mm<sup>2</sup> Oxford  
199 Inca EDX detector. To investigate approximate calcium/phosphorus atomic ratios for each group,  
200 spectra were acquired on scaffolds for 30 s (n=6, 2 technical replicates per scaffold). Element maps  
201 were constructed by taking 2 frames at a resolution of 256 x 192 with map dwell of 4000  $\mu$ s and  
202 linescan dwell of 2000  $\mu$ s.

### 203 *3.2.2 X-ray diffraction*

204 To obtain powder samples for x-ray diffraction (XRD) analysis, 10 x SBF was allowed to precipitate in  
205 solution at a pH of 6, while for the nnHA group, calcium and phosphate solutions were mixed  
206 together and allowed to precipitate. Solutions were centrifuged at 5,000g for 40 min to collect the  
207 precipitate, which was then placed in dishes and dried for 4h at 50°C in an oven. The resulting  
208 mineral was ground into a powder using a mortar and pestle. The hydroxyapatite powder used for  
209 iHA was used for XRD analysis without any further processing. Samples were loaded in a Bruker D8  
210 ADVANCE powder diffractometer and run for 1 h from 5 - 80° in the 2 $\theta$  range with a monochromatic  
211 Cu-K $\alpha$  radiation source. Values for crystallinity and crystallite size were calculated using  
212 DIFFRAC.SUITE EVA 4.1.1. Crystallite size was calculated from taking 5 measurements of the (211)  
213 peak in pHA and iHA groups. In the iHA group, crystallite size was calculated from the peak in the  
214 position of (211), (112) and (300), due to the broad peaks resulting in their merging.

### 215 *3.2.3 Calcium staining*

216 Samples were taken from scaffolds using a 2mm biopsy punch (n=5) and incubated with 1% alizarin  
217 red s (Sigma Aldrich, A5533) in distilled water for 10 min at a pH of between 4.1 – 4.3. Samples were  
218 rinsed 3 times with water and allowed to dry prior to imaging. To quantify bound stain, 400  $\mu$ l of  
219 10% acetic acid was applied and samples incubated at room temperature for 30 min while shaking at  
220 150rpm. The acetic acid was added to 1.5 ml tubes, vortexed vigorously and heated to 85°C for 10  
221 min. Tubes were transferred to ice for 5 min, centrifuged at 20,000g for 15 min, and 300  $\mu$ l of the  
222 supernatant was added to new tubes along with 120  $\mu$ l of 10% ammonium hydroxide. Standards  
223 were made with dilutions of alizarin red solution in distilled water, with the pH of each adjusted to  
224 between 4.1 – 4.3. Samples and standards were read at 405 nm in a 96-well plate.

#### 225 3.2.4 Water contact angle

226 The water contact angle of all scaffold groups was quantified using a FTA125 contact angle analyzer  
227 (First Ten Angstroms Inc.). Samples were prepared using an 8mm biopsy punch (n=6-7). All  
228 measurements were taken 10 frames after contact of the water with the sample.

#### 229 3.2.5 Tensile testing

230 Rectangular samples (n=4) of dimension 5 x 20 mm were taken from scaffolds and used for tensile  
231 testing in a Zwick Z005 with 5N load cell (A.S.T. – Angewandte System Technik GmbH). Samples  
232 were pre-loaded to 0.002N at a speed of 1mm/min, and then loaded at a speed of 10mm/min  
233 with a time save interval of 0.1s. Load-displacement curves were graphed and used to determine  
234 the stiffness, toe region stiffness and yield force for each group.

### 235 3.3 Human bone marrow mesenchymal stem/stromal (hMSC) cell culture

236 Scaffolds were punched to a diameter of 8 mm and UV sterilised for 20 min on each side before  
237 being mounted in stainless steel holders and placed in 24-well plates. Scaffolds were then pre-wet in  
238 a graded ethanol series of 100%, 90% and 70% for 20 min each before being washed three times in  
239 phosphate buffered saline (PBS). They were then incubated overnight in DMEM with 10% FBS at  
240 37°C. Human bone marrow mesenchymal stem/stromal cells (hMSCs) were isolated from bone  
241 marrow (Lonza, US), trilineage potential verified (data not shown), and seeded at a number of  
242 10,000 cells per scaffold. Scaffolds were transferred to new well plates after 24 h, and cultured in  
243 osteogenic medium (OM) from day 3, which consisted of 10% FBS DMEM supplemented with  
244 100nM dexamethasone, 10mM  $\beta$ -glycerol phosphate and 50 $\mu$ g/ml ascorbic acid. Medium was  
245 changed every 3.5 days.

### 246 3.4 Proliferation

247 At days 1,7,14 and 21, scaffolds were added to 100 $\mu$ l lysis buffer (n=4) containing 0.2% Triton X-  
248 100, 1mM Tris pH8, with phenylmethylsulfonyl fluoride (PMSF) being added at a ratio of 1:200 just  
249 before use, and stored at -80°C. Before DNA quantification, samples underwent sonication for 60 s  
250 and subjected to three freeze-thaw cycles in liquid nitrogen before being stored on ice. DNA content  
251 was quantified using a Quant-iT™ PicoGreen™ dsDNA Assay Kit (Invitrogen, P7589), with excitation  
252 and emission wavelengths of 485nm and 528nm respectively. The DNA content in 10,000 hSSCs  
253 seeded and pelleted in centrifuge tubes was also quantified to calculate the total number of cells  
254 present on scaffolds.



## 255 **3.5 Characterisation of hMSC osteogenic differentiation**

### 256 *3.5.1 Intracellular alkaline phosphatase (ALP)*

257 Intracellular ALP was quantified at days 14 and 21 (n=4). 50 µl of 5mM pNPP was added to wells  
258 along with 10 µl of cell lysate and 70µl MilliQ water in a 96-well plate. Standards were comprised of  
259 serial dilutions of p-Nitrophenyl phosphate (pNPP, Sigma Aldrich, N1891) with 10µl of 43µM ALP  
260 enzyme (Sigma Aldrich, P6774) being added to each. Plates were incubated for 1 h in the dark at  
261 room temperature, and reactions were then stopped using 20µl of 3M NaOH. Absorbance was read  
262 on plates at 405 nm, and ALP activity was calculated as the amount of pNPP generated as a function  
263 of sample volume and reaction time.

### 264 *3.5.2 Collagen production*

265 Scaffolds were cultured up to 21 days before evaluating collagen content. Cell-scaffold constructs  
266 were rinsed in PBS, fixed in 10% neutral buffered formalin for 15 min and rinsed again in PBS before  
267 storage at -20°C. Scaffolds were stained with 200µl of 1mg/ml of Direct Red 80 (Sigma Aldrich,  
268 365548) in a saturated aqueous picric acid solution for 1 h with shaking at 150 rpm. Scaffolds were  
269 then washed twice with 0.5% acetic acid and allowed to dry overnight before imaging. To quantify  
270 collagen content, 500µl 0.5M NaOH was added to wells under shaking until stain was dissolved, and  
271 solutions were added to 1.5 ml tubes. Tubes were centrifuged at 14,000g for 10 min to pellet debris.  
272 Standards were made by adding direct red staining solution to 8µl of collagen I (Corning, #354249)  
273 before centrifuging at 14,000g for 10 min and re-suspending the collagen in 500µl 0.5M NaOH. The  
274 absorbance of samples and standards were read at 490 nm in 96-well plates.

### 275 *3.5.3 Calcium production*

276 Cell-scaffold constructs were investigated for total calcium content after 21 days using 1% alizarin  
277 red S solution as previously described for calcium staining in scaffold characterisation. Cell-free  
278 scaffolds were also cultured up to 21 days to determine the contribution of total calcium from cell  
279 mineralisation versus the calcium present due to mineral modification of scaffolds.

## 280 **3.6 BMP2 functionalisation of MEW scaffolds**

### 281 *3.6.1 BMP2 adsorption onto scaffolds*

282 Scaffolds were prepared, sterilised and pre-wet in a graded ethanol series as previously described in  
283 section 3.3 before being washed three times in PBS. Recombinant human BMP2 (Peprotech 120-02)  
284 was diluted to 50 µg/ml in PBS, with 20 µl of solution containing a total of 1 µg BMP2 being placed

285 on each scaffold and incubated for 4 h at room temperature. BMP2 was then removed and scaffolds  
286 were allowed to dry overnight.

### 287 3.6.2 *BMP2 release kinetics*

288 Scaffolds were placed in 48-well plates (n=4) and 200  $\mu$ l of PBS added to each. At each time-point,  
289 PBS was removed and 1% BSA added to result in a final BSA concentration of 0.1%. 200  $\mu$ l of fresh  
290 PBS was then added to each well. Samples were stored at -80°C until BMP2 quantity was determined  
291 via ELISA (R&D Systems DY355-05). Cumulative BMP2 release was studied at time-points 1 h, 6 h,  
292 and days 1, 3, 7, 14 and 21.

### 293 3.6.3 *Characterisation of osteogenic differentiation*

294 After BMP2 adsorption, 10,000 hMSCs were seeded onto scaffolds (n=4), and cultured up to 21 days  
295 after which DNA content was investigated to determine total cell number. Scaffolds were also  
296 cultured up to 21 days to assess osteogenic potential in terms of ALP activity, collagen production  
297 and calcium production as described previously.

## 298 3.7 **Statistical analysis**

299 Tensile testing and material characterisation data is presented in terms of average and standard  
300 deviation. Subsequent biological data is presented in terms of average and standard error of the  
301 mean. Statistical analysis was performed using one-way ANOVA and Tukey's multiple comparison  
302 post-test. Data from the BMP2 loading study was analysed using two-way ANOVA and Bonferroni's  
303 multiple comparison test.

## 304 4 **Results**

### 305 4.1 **MEW fibre topography is significantly altered by bulk and surface modification**

306 The topography of 90° orientate fibrous MEW scaffolds was investigated following modification with  
307 calcium phosphate based materials, where significant changes were identified with minimal  
308 influence on macroscopic scaffold morphology. Control fibres have a diameter of 9.1  $\mu$ m (SD = 1.0),  
309 with relatively featureless surface topography (Figure 1A). The pHA coating protocol yields a rosette-  
310 like arrangement of plates of average diameter 555.3 nm (SD = 193.2) and thickness 26.0 nm (SD =  
311 8.6) (Figure 1B). Total fibre diameter including the coating is 13.5  $\mu$ m (SD = 2.6), giving an average  
312 coating thickness in the pHA group of 2.2  $\mu$ m. In stark contrast to this, the nnHA coating protocol  
313 results in the formation of nano-needles on the fibre surface (Figure 1C), with a length and diameter  
314 of 100.0 nm (SD = 29.0) and 37.0 nm (SD = 7.1) respectively. These needles form occasional  
315 aggregates which range in diameter from 150 – 500 nm. Total fibre diameter shows a minimal

316 increase compared to the control with a value of to 10.2  $\mu\text{m}$  (SD = 1.0), yielding a total coating  
317 thickness in this group of 0.55  $\mu\text{m}$ . The incorporation of HA within fibres in iHA during the MEW  
318 process yields minimal changes in surface topography, with the majority of visible particles being  
319 seen as bulges just below the fibre surface, while several can also be seen to protrude above the  
320 surface with no covering of PCL (Figure 1D). Particles have an average diameter of 147.2 nm (SD =  
321 78.5), as measured within PCL fibres. The incorporation of HA also has an influence on the quality of  
322 the MEW process, with periodic pulsing of the Taylor cone resulting in a larger fibre diameter  
323 distribution (fibre diameter = 11.8  $\mu\text{m}$ , SD = 4.2).

324

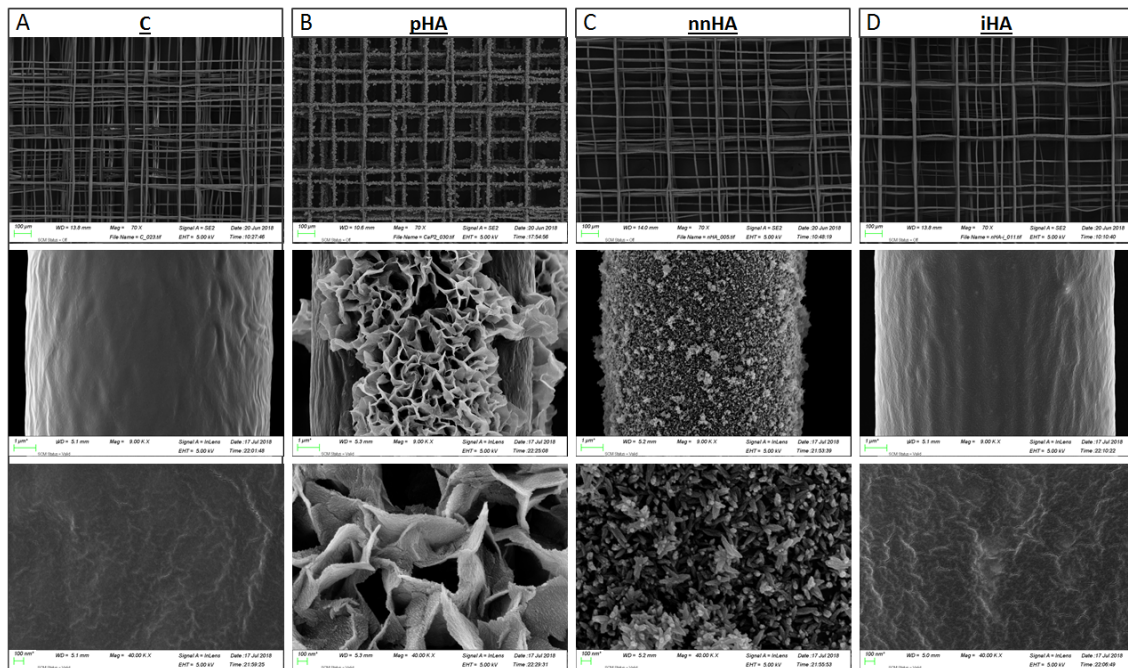

325

326 **Figure 1** SEM imaging of scaffold groups illustrating the “plate” coating morphology in pHA, “needle” morphology in nnHA,  
327 and the presence of HA nanoparticles both within and protruding above the surface of the fibres in iHA.

## 328 4.2 CaP treatments modify surface chemistry

### 329 4.2.1 Element analysis

330 The coating chemistry and distribution in fibres was investigated via EDX analysis. The presence and  
331 distribution of calcium and phosphorous was first investigated via element mapping where, as  
332 expected, there was no detection in the control (Figure 2A). A consistent distribution of both  
333 elements was seen in pHA and nnHA coated fibres, while a sparse distribution in the iHA group  
334 confirmed the presence of HA particles within fibres. Carbon and oxygen were present in all groups  
335 from the PCL, as well as calcium and phosphorous as seen in the spectra of all groups except the

336 control (Figure 2C, merge Figure 2D). A key difference in the pHA group was seen with the presence  
 337 of sodium and magnesium in this coating. Ca/P ratios were investigated (Figure 2D) and were found  
 338 to be close to stoichiometric hydroxyapatite with a ratio of 1.66 for the pHA group. The iHA group  
 339 was investigated using both MEW scaffolds with HA incorporated, as well as the stock powder, with  
 340 both having a resulting ratio of 1.76. The nnHA coating group deviated slightly from these findings,  
 341 with a more calcium-rich HA with a ratio of 1.97 being identified.

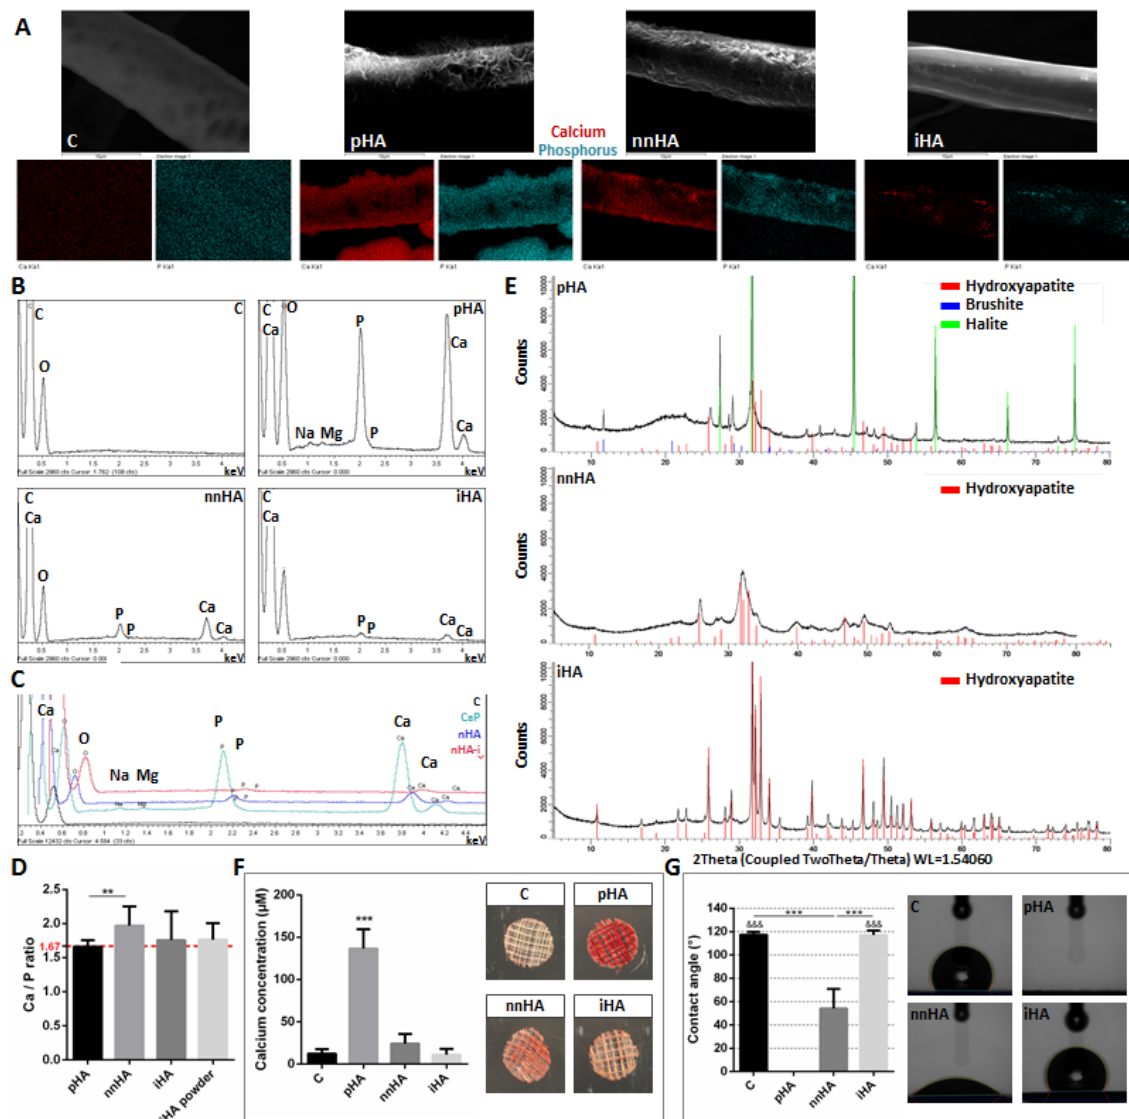

342

343 **Figure 2** Chemical and physical characterisation of MEW-hydroxyapatite scaffolds. Element mapping of SEM images via EDX  
 344 analysis illustrating the distribution of calcium and phosphorus in each group (A). Representative EDX spectra of all groups  
 345 (B) and merge of spectra (C). Calcium to phosphorus ratios of EDX spectra (n=6 scaffolds, n=2 technical replicates) (D). XRD  
 346 analysis of powder representative of CP, nnHA and iHA groups (E). Alizarin red staining of scaffolds (n=5) (F). Water contact  
 347 angle illustrating increased hydrophilicity after hydroxyapatite coating (n=6-7) (G).

348 *4.2.2 Crystal structure of surface and bulk modifications*

349 XRD analysis was further conducted to characterise the crystal structure between groups (Figure 2E).  
350 Brushite, hydroxylapatite and halite were identified in the pHA group, in close agreement with  
351 previous literature [51], with a crystallinity of 61.3%. The nnHA and iHA groups were both shown to  
352 be composed solely of hydroxyapatite, with crystallinity of 52.5% and 69.3% respectively. The  
353 broader peaks in the nnHA group are indicative of a smaller crystallite size, which was found to be  
354 8.5 nm. This is in comparison to the larger crystallite sizes in pHA and iHA, which were measured at  
355 105.8 nm and 75.0 nm respectively.

356 *4.2.3 Calcium content of PCL modifications*

357 The total calcium content as determined via quantification of alizarin red staining was investigated  
358 following scaffold modification with calcium phosphate minerals (Figure 2F). The calcium detected in  
359 C is minimal, and is due to slight background staining of the PCL. The greatest amount of calcium was  
360 found on pHA where nearly 150  $\mu\text{m}$  was detected and was significantly greater than all other  
361 approaches. nnHA contained the second largest quantities of calcium but was still 6-fold less than  
362 that with pHA and was not significantly different to iHA. The calcium content detected in iHA is only  
363 marginally greater than that detected from background staining (C) due to the majority of HA  
364 particles being distributed throughout the bulk of the fibres.

365 *4.2.4 Surface treatment enhances material hydrophilicity*

366 The hydrophilicity of groups was investigated and found to correlate closely with their calcium  
367 content (Figure 2G). This is seen in the complete spreading of water on pHA, which has the greatest  
368 calcium content. The nnHA group also exhibited a significant degree of hydrophilicity, with a mean  
369 contact angle of 56.0°. The C and iHA groups were both shown to be hydrophobic in comparison,  
370 with contact angles of 117.3° and 117.1° respectively.

371 **4.3 Mechanical properties are enhanced via HA-incorporation into PCL MEW fibres**

372 Incorporation of HA into PCL in iHA is seen to increase its stiffness and yield force, while all coating  
373 protocols have minimal influence on mechanical behaviour (Figure 3A,B). Stiffness in the linear  
374 elastic region between 0.1 - 0.3 N is greatest in iHA scaffolds (Figure 3C), while stiffness in the toe  
375 region is not seen to be significantly altered between groups (Figure 3D). Yield force of iHA scaffolds  
376 is also significantly enhanced compared to all other groups, with an average fold increase of 1.4.

377

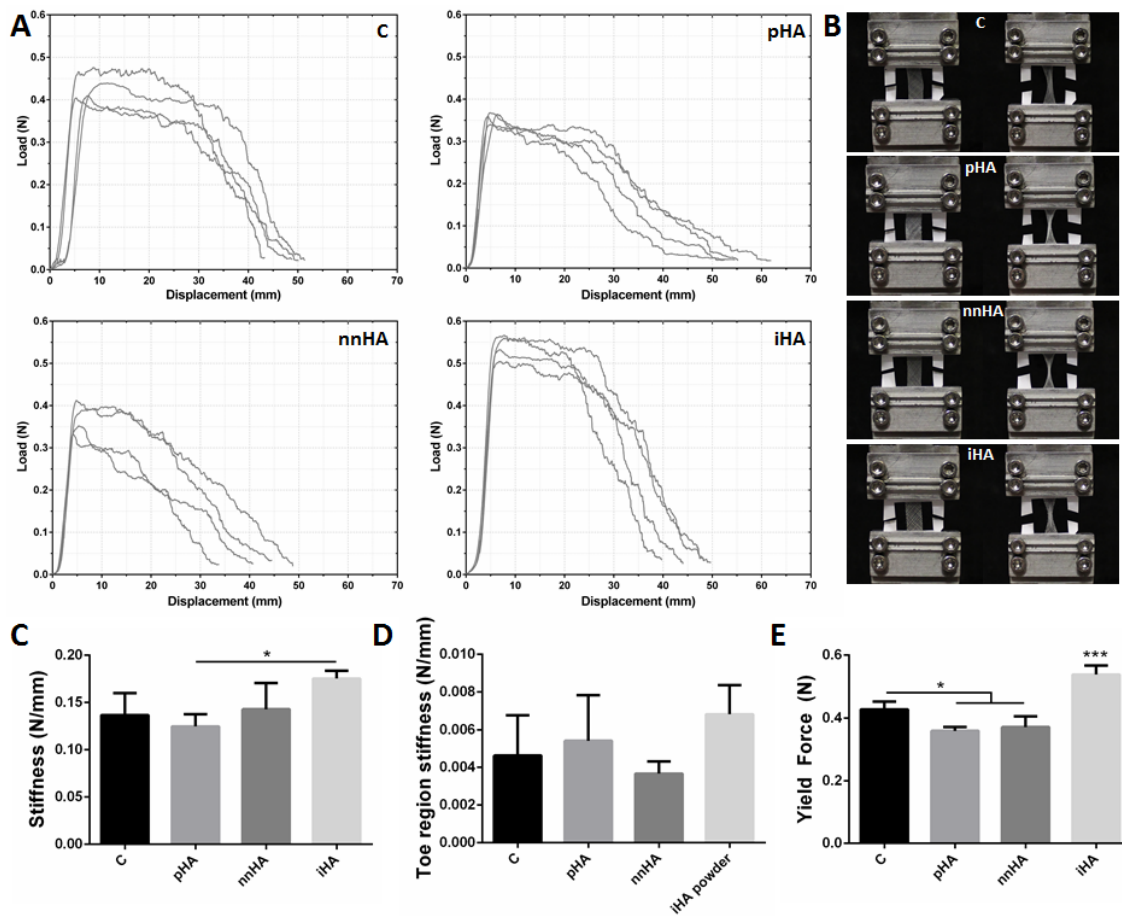

378

379 **Figure 3** Mechanical characterisation of scaffolds via tensile testing. The incorporation of HA into fibres (iHA) can be seen  
 380 to alter the mechanical properties of PCL micro-fibres (A). Scaffolds before tensile testing, and after being loaded to  
 381 approximately 50% of the yield strain (B). Significant increases in stiffness seen in iHA (C), with no change in toe region  
 382 stiffness (D). Yield force of iHA scaffolds is also significantly increased (E). (n=4).

#### 383 4.4 Attachment and proliferation of hMSCs

384 Cells adhere to scaffolds with an average seeding efficiency of 25%, with approximately 1,100 –  
 385 3,400 cells remaining as quantified after 24 h post seeding. Adherent cells were found to branch  
 386 across fibres resulting in elongated. Adherent hMSCs were commonly found branching across  
 387 adjacent fibres as has been previously demonstrated with this fibre architecture [28]. Interestingly  
 388 the pHA coating resulted in a slightly altered cellular morphology with hMSCs adhering and spreading  
 389 across the deposited mineral, masking the underlying fibre architecture (Figure 4A). The initial cell  
 390 seeding efficiency is lowest in the coated scaffold groups; pHA and nnHA. This trend is seen to level  
 391 off by D7 however, where cell number reaches the initial seeding quantity at a number of 10,000 per  
 392 scaffold. Cells then proliferate 2-fold per week for the remainder of the study, with an average of  
 393 24,000 cells at D14 and 41,000 cells at D21. While there are no significant differences between

394 groups at any time-point, a trend of reduced cell number in the pHA scaffold group is seen at D14  
395 and D21.

396

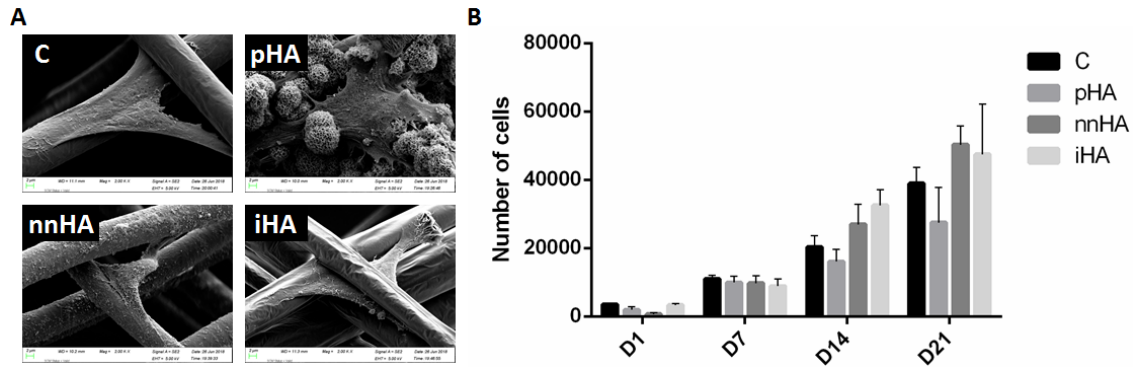

397

398 **Figure 4** SEM imaging of cell seeded scaffolds after 24 h culture (A) Cell proliferation as quantified by DNA content.  
399 Proliferation in pHA scaffolds can be seen to be attenuated D14 compared to other scaffold groups (B). (n=4).

#### 400 4.5 Surface treatment significantly enhances hMSC osteogenesis

##### 401 4.5.1 ALP activity

402 No significant trends were identified in hMSC ALP expression between each scaffold at D14 and D21.  
403 Total ALP activity can however be seen to be greater in nnHA and iHA groups at these time-points  
404 (Figure 5A). Of note is the 2.2-fold increase in ALP activity in nnHA at D21 compared to D14, in  
405 contrast with all other groups which remain constant between these time-points. Normalising these  
406 results to cell number reveals no further trends in ALP expression (Figure 5B), which remains  
407 relatively constant between groups.

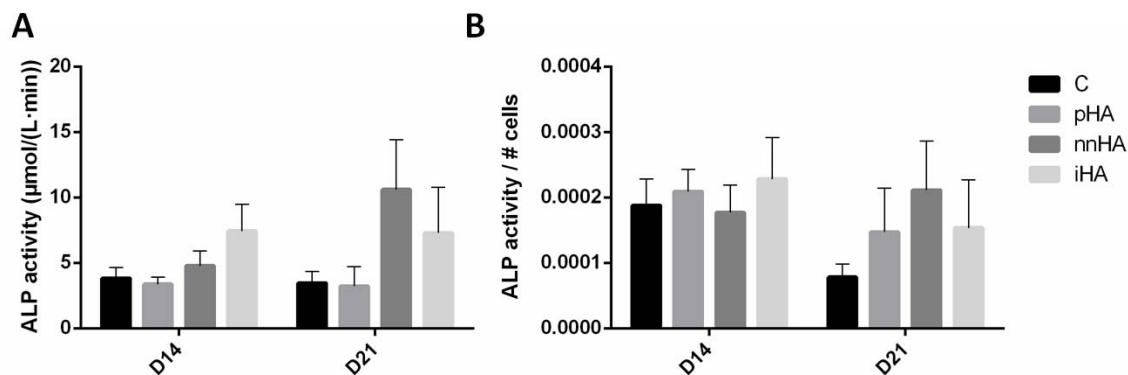

408

409 **Figure 5** ALP activity in hMSCs at D14 and D21. No significant changes in total ALP activity (A) or ALP activity normalised to  
410 cell number (B) were identified. (n=3-4).

#### 411 4.5.2 hMSC Collagen production

412 Collagen production is shown to be enhanced in coated scaffold groups (Figure 6). Total collagen  
413 quantity is greatest in pHA and nnHA at D21, with a 1.7 and 1.5-fold increase respectively compared  
414 to control scaffolds. This effect is further magnified in the pHA group when normalising results to cell  
415 number (Figure 6C), which is significantly greater than other groups. Collagen content per cell is 3.4-  
416 fold greater in pHA than control, and over 2.5-fold greater than nnHA and iHA groups.

417

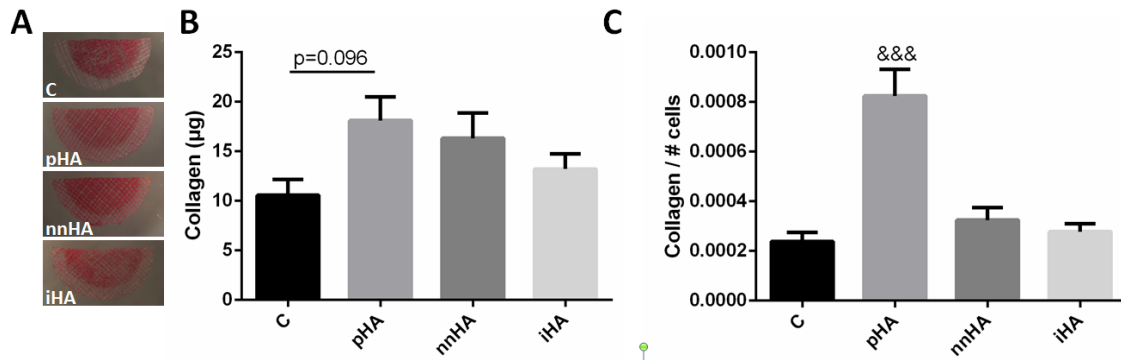

418

419 **Figure 6** Collagen production at D21 (A). Total collagen is enhanced in the pHA group compared to C (A), while a significant  
420 increase compared to all groups is seen when collagen is normalised to cell number (B). (n=4). & = statistical significance  
421 compared to all other groups (&&& = p<0.001).

#### 422 4.5.3 hMSC Calcium production

423 As with previous outputs of osteogenic differentiation, mineral production is seen to be enhanced in  
424 the coated scaffold groups (Figure 7A). These results encompass both mineralisation due to calcium  
425 production by cells, as well as the calcium present due to the treatments prior to cell seeding. Total  
426 mineral in pHA was 6.7-fold greater than C and iHA (Figure 7B). The greatest concentration following  
427 21 days culture was found on scaffold nnHA, with this being over 12-fold greater than the calcium  
428 content in C and iHA and 1.8-fold greater than pHA. These findings are further enhanced when  
429 considering calcium due to cell mineralisation alone. The cell contribution to mineral in pHA was  
430 59%, with the remainder the mineral from the scaffold coating. In stark contrast, 92% of the mineral  
431 in nnHA is contributed by the cells. Considering this cell mineralisation alone, nnHA is over 14-fold  
432 greater than C and 2.9-fold greater than pHA. When total calcium is normalised to cell number at  
433 D21 (Figure 6C), calcium in pHA and nnHA groups are seen to be significantly greater than others,  
434 with an over 10-fold increase in mineral production per cell in pHA and over 12-fold increase in nnHA  
435 when compared to untreated control PCL scaffolds.



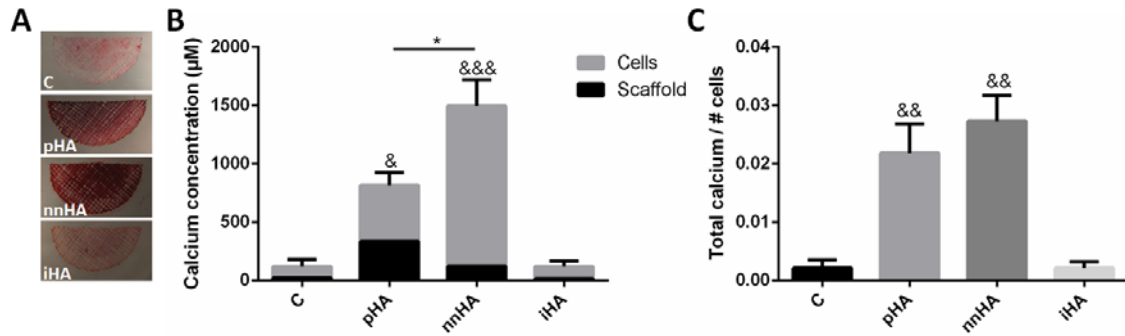

436

437 **Figure 7** Calcium content at D21 with contributions from scaffold and cell mineralisation (A). Total calcium content is  
438 significantly enhanced in nnHA and pHA groups (B). Calcium content normalised to cell number is also enhanced in these  
439 groups compared to C and iHA (C). (n=4). & = statistical significance compared to C and iHA groups (& = p<0.05, && =  
440 p<0.01, &&& = p<0.001). \* = p<0.05.

#### 441 **4.6 Coating dissolution after long term culture**

442 After 21 days in culture, the pHA coating was found to be largely intact as seen via SEM imaging,  
443 with minor changes seen in a more rough surface topography (Figure 8B) compared to at D1 (Figure  
444 8A). In stark contrast to this, the nnHA coating is seen to have undergone considerable dissolution,  
445 with loss of the nano-needle topography and formation of a coating of nano-spheres with diameter  
446 of approximately 5-20 nm. Consistent fracturing of this coating can also be seen. The iHA group is  
447 also considerably altered, with extensive precipitates seen at the fibre surface in contrast to the  
448 relatively smooth fibre topography at D1.

449

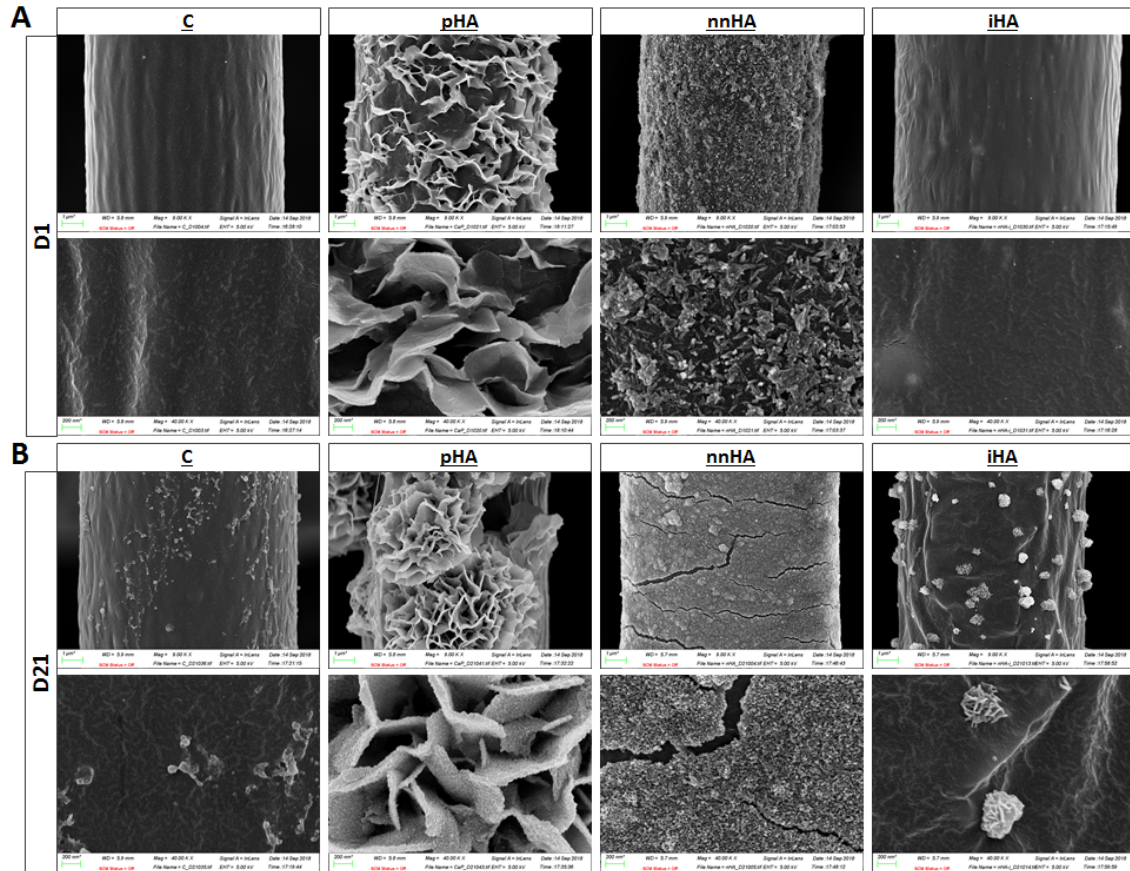

450

451 **Figure 8** Fibre appearance after day 1 (A) and day 21 (B) in culture. Plates in the pHA group appear more rough at D21, with  
452 morphology otherwise unchanged. The nnHA coating is significantly altered, with the initial nano-needles becoming  
453 spherical and smaller in nature, and the coating exhibiting widespread fracturing. A greater amount of mineral  
454 precipitation on the fibre surface is seen in iHA at D21, where the near-surface HA appears to act as sites for mineral  
455 nucleation.

456

#### 457 **4.7 Mineral architecture mediates BMP2 controlled release and further enhances hMSC** 458 **osteogenesis**

459 In order to investigate the capacity of mineral architectures to bind, stabilise, and release growth  
460 factors, scaffolds were loaded with BMP2 and release kinetics and stem/stromal cell osteogenesis  
461 investigated. There is an initial burst release of BMP2 from the C, pHA and iHA materials, with a  
462 more sustained initial controlled release from nnHA (Figure 9A). The majority of the BMP2 is  
463 released by C after 7 days with a total amount of approximately 50%, where the curve is seen to  
464 plateau with minimal further release up to day 21, indicating a lower level of adsorption of the  
465 protein with reduced affinity to the scaffold (Figure 9B). At 7 days, release percent from pHA and iHA

466 is 65% and 61% respectively, in contrast to nnHA, with a value of 46%. Between D7 and D21, nnHA  
467 continues to maintain the greatest level of controlled release at a rate of 9.8% per week.

468 The controlled release of BMP2 from the MEW scaffolds is seen to enhance cell proliferation in each  
469 group. Of particular note is the significant 1.9-fold increase in cell number on the nnHA scaffolds at  
470 day 21 compared to control nnHA scaffolds, in addition to significantly enhanced DNA in BMP2  
471 treated nnHA vs pHA, with a fold change of 2.9 (Figure 9C). The effect of BMP2 delivery on the  
472 osteogenic differentiation of hMSCs was investigated via ALP activity, collagen and mineral  
473 deposition as before. ALP increases were only seen in the C scaffolds, however as with all other  
474 groups, this was not significant (Figure 9D). Collagen content was also investigated, with the greatest  
475 increases in C and iHA compared to control scaffolds (Figure 9E). Overall collagen content was  
476 between 16-20  $\mu\text{g}$  in all groups, with greatest collagen content in nnHA after 21 days. Finally,  
477 mineralisation is further enhanced in CP BMP2 functionalised scaffolds, with the greatest changes  
478 seen in the nnHA and iHA groups, with increases of 259  $\mu\text{M}$  and 372  $\mu\text{M}$  respectively (Figure 9F). In  
479 summary, the nnHA group exhibits the greatest potential for modification with additional factors, as  
480 seen by the greatest level of sustained protein release, significantly enhanced DNA content, and the  
481 greatest levels of collagen content and mineralisation content following 21 days in culture.

482

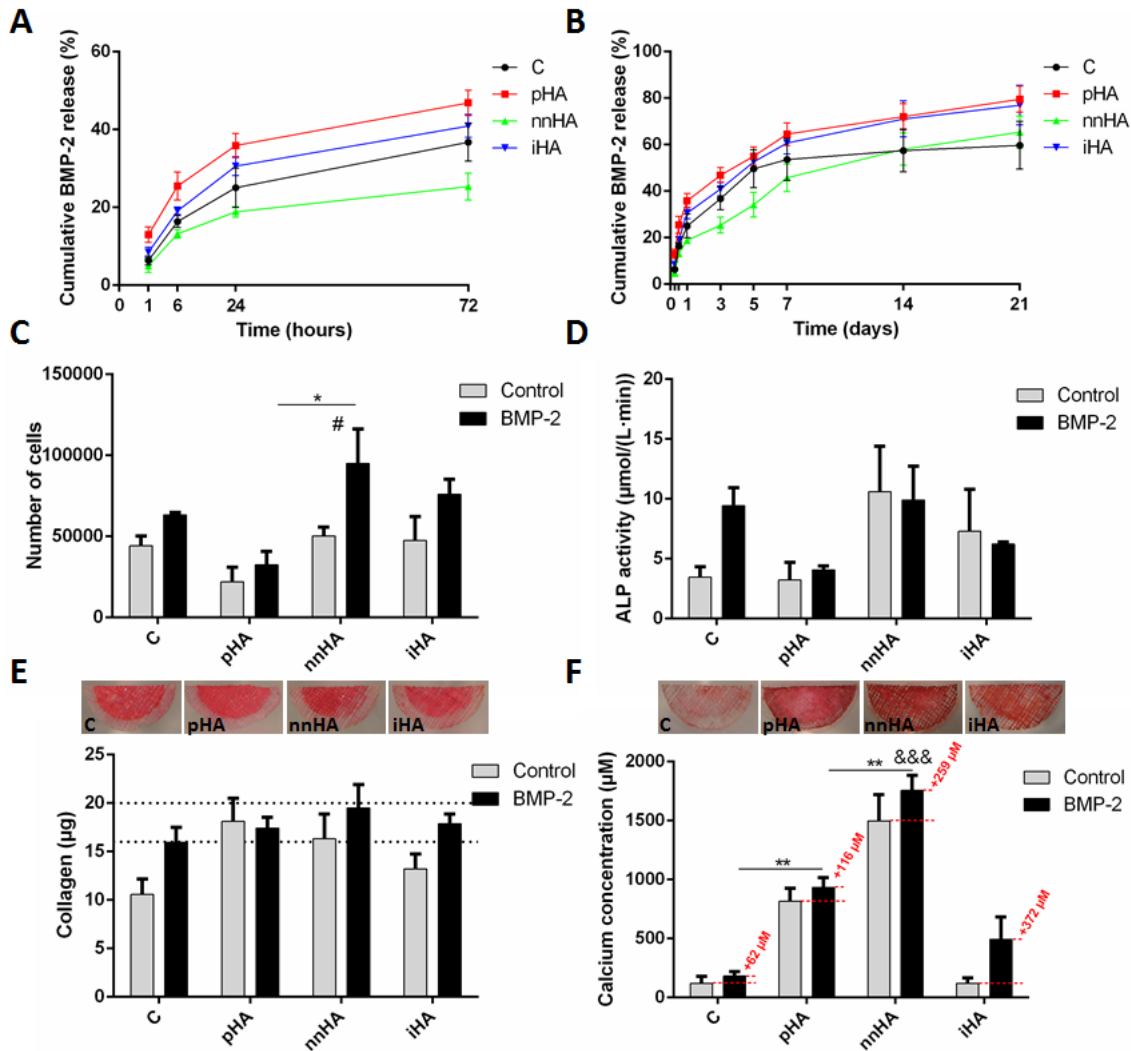

483

484 **Figure 9** Cumulative BMP2 release up to D3 (A) and up to D21(B) (n=4). Number of cells (C), ALP activity (D), collagen  
 485 content (E) and calcium content (F) with BMP2 treatment at D21 compared to data from untreated scaffolds as presented  
 486 in previous figures. \* = statistical significance via one-way ANOVA and Tukey multiple comparison test within BMP2 group  
 487 only. & = statistical significance vs C and iHA groups with same method as previously. # = statistical significance between  
 488 Control and BMP2 in the nnHA group via two-way ANOVA and Bonferroni's multiple comparison test.

## 489 5 Discussion

490 Due to a lack of bone autograft supply, bioinspired synthetic alternative materials are required to  
 491 enhance bone regeneration in critically sized defects. Cell behaviour and function are mediated by  
 492 microenvironmental biophysical and biochemical cues, with the architecture and chemistry of the  
 493 surrounding extracellular matrix being fundamental in this regard. Bone at a cellular level consists of  
 494 arranged fibres with a cross-fibrillar mineral phase made up of curved nano-sized needle shaped

495 crystals. Recapitulating this unique multiscale architecture may represent an innovative approach to  
496 develop effective bioinspired materials to promote bone regeneration. In this study, we utilise a 90°  
497 fibrous MEW scaffold architecture, which we have previously optimised for human MSC  
498 osteogenesis [28], and built on this foundation by developing biomimetic mineral functionalisation  
499 strategies consisting of either intrafibrillar or cross fibrillar configurations. Interestingly using a novel  
500 coating approach, we were able to grow nano-needle shaped HA (nnHA) crystals on the surface of  
501 the MEW fibres which closely mimic that found in bone. These bioinspired nnHA topographies  
502 significantly enhanced hMSC osteogenesis over traditional SBF plate HA (pHA) coatings or  
503 intrafibrillar HA (iHA) scaffolds. Moreover, given the protein stabilising properties of mineral, we  
504 demonstrated that nnHA facilitated a controlled release of BMP2 from the scaffold which further  
505 enhanced mineral deposition by stem/stromal cells. This study thus outlines a method for fabricating  
506 scaffolds with precise fibrous micro-architectures and bone mimetic nano-needle HA extrafibrillar  
507 coatings which significantly enhance MSC osteogenesis and therapeutic delivery and thus hold great  
508 promise for bone tissue regeneration.

509 The microarchitecture/topography, material chemistry, and mechanical properties of each MEW  
510 scaffolds is altered followed CaP modifications. The concentrated SBF pHA coating technique  
511 resulted in the formation of plates arranged in a “cauliflower” or “rosette” like coating morphology,  
512 consistent with previously published findings using this approach [51-53] and typical of the plate or  
513 “petal-like” morphology of apatite formed via supersaturated solutions [54]. In contrast, the nnHA  
514 coating procedure which we have developed resulted in a vastly different morphology consisting of a  
515 fine, extrafibrillar, nano-needle coating which form occasional aggregates, closely mimicking the  
516 fundamental mineral units of bone in terms of morphology and composition recently identified [4].  
517 The incorporation of HA into PCL in the iHA group does not have a significant influence on fibre  
518 surface morphology, as seen by SEM and water contact angle measurements, however, mechanical  
519 properties are enhanced with this approach. EDX analysis was further conducted to investigate the  
520 elemental distribution and composition of modified fibres. The Ca/P ratios of all groups were within  
521 the range seen in native bone, which has typical Ca/P ratios varying between 1.34 – 2.17 with a  
522 median value of 1.69, as seen in samples from the femoral neck and the rib bones of healthy humans  
523 [55-57] (note: weight ratios in references were converted to atomic ratios). To further investigate  
524 the crystal structure of our scaffold groups, we performed an x-ray diffraction analysis. Interestingly,  
525 the broad peaks of the XRD spectra of nnHA closely mimic those of native bone. This is in  
526 comparison to the other groups which are more crystalline in nature. In summary, we have  
527 demonstrated that our nnHA coating procedure closely mimics the nano-architecture, composition  
528 and crystal structure of native bone.

529 Bone bioinspired architectures can significantly enhance MSC mediated bone formation, as we have  
530 demonstrated via long term in-vitro studies. Cell behaviour was investigated on modified scaffolds  
531 via proliferation and markers of osteogenic differentiation. Cell number was greatest in the nnHA  
532 group after 21 days, with the lowest number of cells in the pHA group. This is consistent with  
533 previous work demonstrating a trend of increased proliferation with reduced HA particle size [34].  
534 We have also demonstrated a corresponding increase in ALP activity in nnHA, however, this result is  
535 not significant. It is known that osteoprogenitor cells initially produce ALP and secrete collagen type  
536 I, with further mineralisation occurring on this matrix at later time-points [58, 59]. We have shown  
537 previously that the fibrous architecture of scaffolds can have a significant influence on hMSC  
538 collagen production [28]. However, our current findings indicate that HA surface topography does  
539 not augment collagen production. Further investigation of calcium deposition demonstrated highly  
540 significant upregulation, particularly with nnHA coating. The majority of the contribution towards  
541 total calcium content is seen to be due to cell-based mineralisation, indicating the significant  
542 influence of nano-scale needles in this extrafibrillar coating in driving stem/stromal cell osteogenic  
543 differentiation. There are several likely factors for this result, in addition to the influence of the  
544 nano-particle size as discussed previously. Greater dissolution of this coating, as demonstrated by  
545 SEM imaging after 21 days in culture will yield a greater release of calcium and phosphate ions into  
546 the medium which can interact with cells and allow for reprecipitation, enhancing mineralisation  
547 [60]. In addition, an inverse relationship between crystallinity and mineralisation has also been  
548 shown [61], providing further evidence for the greater cell mineralisation on our nnHA group, which  
549 has the lowest crystallinity. This therefore suggests that the superior bone formation demonstrated  
550 with the nnHA coating is multifactorial, harnessing several mechanisms to maximise regeneration.

551 Nano-needle structured HA extrafibrillar coatings effectively bind, and slowly deliver stable BMP2,  
552 enhancing hMSC proliferation and bone formation. We investigated the protein binding and release  
553 capacity of these scaffold modifications via a BMP2 adsorption study. Recent studies have  
554 demonstrated that mineral can stabilise bound proteins, preventing conformational changes,  
555 maintaining biological activity for weeks during release and that this stabilisation is enhanced within  
556 nanostructured coatings [6]. The nnHA group was shown to facilitate the most sustained release of  
557 BMP2 over 21 days. Interestingly, this resulted in significantly enhanced proliferation in this group  
558 demonstrating biological activity, while markers of osteogenic differentiation were also marginally  
559 increased. A previous study has reported similar results, where continuous supplementation of  
560 media with BMP2 resulted in enhanced proliferation of hMSCs without initiating osteogenic  
561 differentiation [62]. However, many studies have also demonstrated the key role of BMP2 in  
562 stimulating osteogenesis [63-65]. We believe that due to the high degree of mineralisation indicating

563 late stage differentiation, day 21 may be too late to capture elevated ALP expression, which is an  
564 early differentiation marker. Consistent with previous findings in this paper, we also believe that  
565 peak collagen levels for our scaffolds are being reached, as seen by the attenuated difference  
566 between groups with BMP2 treatment compared to untreated scaffolds. While no significant  
567 increases in calcium content were identified, it must be noted that the levels in nnHA are already 14-  
568 fold greater than control scaffolds in the absence of BMP2 treatment, and the further increases in  
569 mineral with BMP2 treatment in nnHA and iHA groups represent a change several fold-times greater  
570 than basal calcium levels in untreated control scaffolds, which we have previously shown to  
571 represent significantly enhanced mineralisation compared to random scaffolds [28]. In summary,  
572 scaffolds with nnHA coating are shown to significantly enhance stem/stromal cell differentiation,  
573 with the controlled release of BMP2 loaded scaffolds further contributing to this effect.

## 574 **6 Conclusions**

575 In conclusion, we utilised MEW technology to create fibrous 3D micro-architectures and further  
576 modified these templates with a novel bioinspired extrafibrillar coating of needle shaped nano-sized  
577 crystals (nnHA). This bone mimetic fibrous and mineral architecture significantly enhanced human  
578 MSC osteogenesis over more established plate like mineral coatings. Moreover, extrafibrillar  
579 coatings of nano-needles facilitated the binding, stabilisation, and controlled release of BMP2 from  
580 the material which further enhanced MSC cell proliferation and bone formation. This study thus  
581 outlines a method for fabricating scaffolds with precise fibrous micro-architectures and bone  
582 mimetic nano-needle HA extrafibrillar coatings which significantly enhance MSC osteogenesis and  
583 therapeutic delivery and thus hold great promise for bone tissue regeneration.

## 584 **7 Funding**

585 The authors would like to acknowledge funding from European Research Council (ERC) Starting  
586 Grant (336882), Science Foundation Ireland (SFI) Support Grant SFI 13/ERC/L2864 and Irish Research  
587 Council Postgraduate Scholarship (GOIPG/2014/493).

## 588 **8 References**

- 589 1. Yaszemski, M.J., et al., *Evolution of bone transplantation: molecular, cellular and tissue*  
590 *strategies to engineer human bone*. *Biomaterials*, 1996. **17**(2): p. 175-85.

- 591 2. Winkler, T., et al., *A review of biomaterials in bone defect healing, remaining shortcomings*  
592 *and future opportunities for bone tissue engineering: The unsolved challenge*. Bone Joint Res,  
593 2018. **7**(3): p. 232-243.
- 594 3. Tzaphlidou, M., *Bone Architecture: Collagen Structure and Calcium/Phosphorus Maps*.  
595 Journal of Biological Physics, 2008. **34**(1-2): p. 39-49.
- 596 4. Reznikov, N., et al., *Fractal-like hierarchical organization of bone begins at the nanoscale*.  
597 Science, 2018. **360**(6388).
- 598 5. Asara, J.M., et al., *Protein sequences from mastodon and Tyrannosaurus rex revealed by*  
599 *mass spectrometry*. Science, 2007. **316**(5822): p. 280-5.
- 600 6. Yu, X., et al., *Nanostructured Mineral Coatings Stabilize Proteins for Therapeutic Delivery*.  
601 Adv Mater, 2017. **29**(33).
- 602 7. Alford, A.I., K.M. Kozloff, and K.D. Hankenson, *Extracellular matrix networks in bone*  
603 *remodeling*. The International Journal of Biochemistry & Cell Biology, 2015. **65**: p. 20-31.
- 604 8. Rutkovskiy, A., K.-O. Stensløkken, and I.J. Vaage, *Osteoblast Differentiation at a Glance*.  
605 Medical Science Monitor Basic Research, 2016. **22**: p. 95-106.
- 606 9. Kane, R. and P.X. Ma, *Mimicking the nanostructure of bone matrix to regenerate bone*.  
607 Materials Today, 2013. **16**(11): p. 418-423.
- 608 10. Lu, P., et al., *Extracellular Matrix Degradation and Remodeling in Development and Disease*.  
609 Cold Spring Harbor perspectives in biology, 2011. **3**(12): p. 10.1101/cshperspect.a005058  
610 a005058.
- 611 11. Bonnans, C., J. Chou, and Z. Werb, *Remodelling the extracellular matrix in development and*  
612 *disease*. Nature reviews. Molecular cell biology, 2014. **15**(12): p. 786-801.
- 613 12. Hutmacher, D.W., et al., *Mechanical properties and cell cultural response of*  
614 *polycaprolactone scaffolds designed and fabricated via fused deposition modeling*. J Biomed  
615 Mater Res, 2001. **55**(2): p. 203-16.
- 616 13. Di Luca, A., et al., *Tuning Cell Differentiation into a 3D Scaffold Presenting a Pore Shape*  
617 *Gradient for Osteochondral Regeneration*. Advanced Healthcare Materials, 2016. **5**(14): p.  
618 1753-1763.
- 619 14. Daly, A.C., et al., *3D Bioprinting for Cartilage and Osteochondral Tissue Engineering*.  
620 Advanced Healthcare Materials, 2017. **6**(22): p. 1700298.
- 621 15. Cox, S.C., et al., *3D printing of porous hydroxyapatite scaffolds intended for use in bone*  
622 *tissue engineering applications*. Materials Science and Engineering: C, 2015. **47**: p. 237-247.
- 623 16. Fierz, F.C., et al., *The morphology of anisotropic 3D-printed hydroxyapatite scaffolds*.  
624 Biomaterials, 2008. **29**(28): p. 3799-3806.



- 625 17. Bergmann, C., et al., *3D printing of bone substitute implants using calcium phosphate and*  
626 *bioactive glasses*. Journal of the European Ceramic Society, 2010. **30**(12): p. 2563-2567.
- 627 18. Inzana, J.A., et al., *3D printing of composite calcium phosphate and collagen scaffolds for*  
628 *bone regeneration*. Biomaterials, 2014. **35**(13): p. 4026-4034.
- 629 19. Hogrebe, N.J., J.W. Reinhardt, and K.J. Gooch, *Biomaterial microarchitecture: a potent*  
630 *regulator of individual cell behavior and multicellular organization*. Journal of Biomedical  
631 Materials Research Part A, 2017. **105**(2): p. 640-661.
- 632 20. Labour, M.-N., et al., *Electrospun Poly-D-L-Lactic Acid Fibrous Scaffolds as a Delivery Vehicle*  
633 *for Calcium Phosphate Salts to Promote In Situ Mineralisation and Bone Regeneration*.  
634 Journal of Biomaterials and Tissue Engineering, 2018. **8**(2): p. 206-217.
- 635 21. Zhou, P., et al., *Loading BMP-2 on nanostructured hydroxyapatite microspheres for rapid*  
636 *bone regeneration*. International Journal of Nanomedicine, 2018. **13**: p. 4083-4092.
- 637 22. Brown, T.D., P.D. Dalton, and D.W. Hutmacher, *Direct writing by way of melt electrospinning*.  
638 Adv Mater, 2011. **23**(47): p. 5651-7.
- 639 23. Hochleitner, G., et al., *Additive manufacturing of scaffolds with sub-micron filaments via*  
640 *melt electrospinning writing*. Biofabrication, 2015. **7**(3).
- 641 24. Wunner, F.M., et al., *Melt Electrospinning Writing of Three-dimensional Poly(epsilon-*  
642 *caprolactone) Scaffolds with Controllable Morphologies for Tissue Engineering Applications*. J  
643 Vis Exp, 2017(130).
- 644 25. de Ruijter, M., et al., *Out-of-Plane 3D-Printed Microfibers Improve the Shear Properties of*  
645 *Hydrogel Composites*. Small, 2017: p. 1702773-n/a.
- 646 26. Castilho, M., et al., *Melt Electrowriting Allows Tailored Microstructural and Mechanical*  
647 *Design of Scaffolds to Advance Functional Human Myocardial Tissue Formation*. Advanced  
648 Functional Materials, 2018. **0**(0): p. 1803151.
- 649 27. Hochleitner, G., et al., *Melt electrowriting below the critical translation speed to fabricate*  
650 *crimped elastomer scaffolds with non-linear extension behaviour mimicking that of*  
651 *ligaments and tendons*. Acta Biomaterialia, 2018. **72**: p. 110-120.
- 652 28. Eichholz, K.F. and D.A. Hoey, *Mediating human stem cell behaviour via defined fibrous*  
653 *architectures by melt electrospinning writing*. Acta Biomater, 2018. **75**: p. 140-151.
- 654 29. Rey, C., et al., *Bone mineral: update on chemical composition and structure*. Osteoporosis  
655 international : a journal established as result of cooperation between the European  
656 Foundation for Osteoporosis and the National Osteoporosis Foundation of the USA, 2009.  
657 **20**(6): p. 1013-1021.

- 658 30. Boskey, A.L., *Bone composition: relationship to bone fragility and antiosteoporotic drug*  
659 *effects*. BoneKEy Reports, 2013. **2**: p. 447.
- 660 31. Habraken, W., et al., *Calcium phosphates in biomedical applications: materials for the*  
661 *future?* Materials Today, 2016. **19**(2): p. 69-87.
- 662 32. Lc, C., *Next generation calcium phosphate-based biomaterials*. Dental materials journal,  
663 2009. **28**(1): p. 1-10.
- 664 33. Zhou, H. and J. Lee, *Nanoscale hydroxyapatite particles for bone tissue engineering*. Acta  
665 Biomaterialia, 2011. **7**(7): p. 2769-2781.
- 666 34. Cai, Y., et al., *Role of hydroxyapatite nanoparticle size in bone cell proliferation*. Journal of  
667 Materials Chemistry, 2007. **17**(36): p. 3780-3787.
- 668 35. Yang, X., et al., *In Vitro Uptake of Hydroxyapatite Nanoparticles and Their Effect on*  
669 *Osteogenic Differentiation of Human Mesenchymal Stem Cells*. Stem cells international,  
670 2018. **2018**: p. 2036176-2036176.
- 671 36. Remya, N.S., et al., *An in vitro study on the interaction of hydroxyapatite nanoparticles and*  
672 *bone marrow mesenchymal stem cells for assessing the toxicological behaviour*. Colloids and  
673 Surfaces B: Biointerfaces, 2014. **117**: p. 389-397.
- 674 37. Liu, Y., et al., *In vitro effects of nanophase hydroxyapatite particles on proliferation and*  
675 *osteogenic differentiation of bone marrow-derived mesenchymal stem cells*. Journal of  
676 Biomedical Materials Research Part A, 2008. **90A**(4): p. 1083-1091.
- 677 38. Domingos, M., et al., *Three-dimensional printed bone scaffolds: The role of nano/micro-*  
678 *hydroxyapatite particles on the adhesion and differentiation of human mesenchymal stem*  
679 *cells*. Proc Inst Mech Eng H, 2016: p. 954411916680236.
- 680 39. Li, B., et al., *Preparation of nano-hydroxyapatite particles with different morphology and*  
681 *their response to highly malignant melanoma cells in vitro*. Applied Surface Science, 2008.  
682 **255**(2): p. 357-360.
- 683 40. Duan, R., et al., *Accelerated bone formation by biphasic calcium phosphate with a novel sub-*  
684 *micron surface topography*. Eur Cell Mater, 2019. **37**: p. 60-73.
- 685 41. Xiong, L., et al., *BMP2-loaded hollow hydroxyapatite microspheres exhibit enhanced*  
686 *osteinduction and osteogenicity in large bone defects*. International journal of  
687 nanomedicine, 2015. **10**: p. 517-526.
- 688 42. Dellinger, J.G., J.A.C. Eurell, and R.D. Jamison, *Bone response to 3D periodic hydroxyapatite*  
689 *scaffolds with and without tailored microporosity to deliver bone morphogenetic protein 2*.  
690 Journal of Biomedical Materials Research Part A, 2005. **76A**(2): p. 366-376.

- 691 43. Notodihardjo, F.Z., et al., *Bone regeneration with BMP-2 and hydroxyapatite in critical-size*  
692 *calvarial defects in rats*. Journal of Cranio-Maxillofacial Surgery, 2012. **40**(3): p. 287-291.
- 693 44. Gonzalez-Fernandez, T., et al., *Mesenchymal stem cell fate following non-viral gene*  
694 *transfection strongly depends on the choice of delivery vector*. Acta Biomaterialia, 2017. **55**:  
695 p. 226-238.
- 696 45. Curtin, C.M., et al., *Innovative Collagen Nano-Hydroxyapatite Scaffolds Offer a Highly*  
697 *Efficient Non-Viral Gene Delivery Platform for Stem Cell-Mediated Bone Formation*. Advanced  
698 Materials, 2012. **24**(6): p. 749-754.
- 699 46. Palazzo, B., et al., *Biomimetic Hydroxyapatite–Drug Nanocrystals as Potential Bone*  
700 *Substitutes with Antitumor Drug Delivery Properties*. Advanced Functional Materials, 2007.  
701 **17**(13): p. 2180-2188.
- 702 47. Sun, W., et al., *Biodegradable Drug-Loaded Hydroxyapatite Nanotherapeutic Agent for*  
703 *Targeted Drug Release in Tumors*. ACS Applied Materials & Interfaces, 2018. **10**(9): p. 7832-  
704 7840.
- 705 48. Martine, L.C., et al., *Engineering a humanized bone organ model in mice to study bone*  
706 *metastases*. Nat. Protocols, 2017. **12**(4): p. 639-663.
- 707 49. Kumta, P.N., et al., *Nanostructured calcium phosphates for biomedical applications: novel*  
708 *synthesis and characterization*. Acta Biomaterialia, 2005. **1**(1): p. 65-83.
- 709 50. Cunniffe, G.M., et al., *The synthesis and characterization of nanophase hydroxyapatite using*  
710 *a novel dispersant-aided precipitation method*. J Biomed Mater Res A, 2010. **95**(4): p. 1142-9.
- 711 51. Vaquette, C., et al., *Effect of culture conditions and calcium phosphate coating on ectopic*  
712 *bone formation*. Biomaterials, 2013. **34**(22): p. 5538-51.
- 713 52. Tas, A.C. and S.B. Bhaduri, *Rapid coating of Ti6Al4V at room temperature with a calcium*  
714 *phosphate solution similar to 10× simulated body fluid*. Journal of Materials Research, 2011.  
715 **19**(9): p. 2742-2749.
- 716 53. Kokubo, T., et al., *Solutions able to reproduce in vivo surface-structure changes in bioactive*  
717 *glass-ceramic A-W3*. Journal of Biomedical Materials Research, 1990. **24**(6): p. 721-734.
- 718 54. Drouet, C., *Apatite Formation: Why It May Not Work as Planned, and How to Conclusively*  
719 *Identify Apatite Compounds*. BioMed Research International, 2013. **2013**: p. 490946.
- 720 55. Zaichick, V. and M. Tzaphlidou, *Determination of calcium, phosphorus, and the*  
721 *calcium/phosphorus ratio in cortical bone from the human femoral neck by neutron*  
722 *activation analysis*. Appl Radiat Isot, 2002. **56**(6): p. 781-6.
- 723 56. Zaichick, V. and M. Tzaphlidou, *Calcium and phosphorus concentrations and the*  
724 *calcium/phosphorus ratio in trabecular bone from the femoral neck of healthy humans as*

- 725            *determined by neutron activation analysis*. Applied Radiation and Isotopes, 2003. **58**(6): p.  
726            623-627.
- 727    57.    Tzaphlidou, M. and V. Zaichick, *Calcium, phosphorus, calcium-phosphorus ratio in rib bone of*  
728            *healthy humans*. Biol Trace Elem Res, 2003. **93**(1-3): p. 63-74.
- 729    58.    Huang, Z., et al., *The sequential expression profiles of growth factors from osteoprogenitors*  
730            *[correction of osteroprogenitors] to osteoblasts in vitro*. Tissue Eng, 2007. **13**(9): p. 2311-20.
- 731    59.    Birmingham, E., et al., *Osteogenic differentiation of mesenchymal stem cells is regulated by*  
732            *osteocyte and osteoblast cells in a simplified bone niche*. Eur Cell Mater, 2012. **23**: p. 13-27.
- 733    60.    Chang, Y.-L., C.M. Stanford, and J.C. Keller, *Calcium and phosphate supplementation*  
734            *promotes bone cell mineralization: Implications for hydroxyapatite (HA)-enhanced bone*  
735            *formation*. Journal of Biomedical Materials Research, 2000. **52**(2): p. 270-278.
- 736    61.    Morgan, J., et al., *In vitro mineralization and implant calcium phosphate-hydroxyapatite*  
737            *crystallinity*. Implant Dent, 1996. **5**(4): p. 264-71.
- 738    62.    Lysdahl, H., et al., *Preconditioning Human Mesenchymal Stem Cells with a Low Concentration*  
739            *of BMP2 Stimulates Proliferation and Osteogenic Differentiation In Vitro*. BioResearch Open  
740            Access, 2014. **3**(6): p. 278-285.
- 741    63.    Beederman, M., et al., *BMP signaling in mesenchymal stem cell differentiation and bone*  
742            *formation*. Journal of biomedical science and engineering, 2013. **6**(8A): p. 32-52.
- 743    64.    Huang, W., et al., *BMP-2 exerts differential effects on differentiation of rabbit bone marrow*  
744            *stromal cells grown in two-dimensional and three-dimensional systems and is required for in*  
745            *vitro bone formation in a PLGA scaffold*. Experimental Cell Research, 2004. **299**(2): p. 325-  
746            334.
- 747    65.    Li, C., et al., *Electrospun silk-BMP-2 scaffolds for bone tissue engineering*. Biomaterials, 2006.  
748            **27**(16): p. 3115-3124.
- 749
